# Supplementary material for: Base‐Assisted Conversion of Protonated d‐Fructose to 5‐HMF: Searching for Gas‐Phase Green Models
Source: PubMed Central journal article supplement — ChemistryOpen. 2019 Sep 4;8(9):1190–8. doi: 10.1002/open.201900173 (PMC6723769; doi:10.1002/open.201900173), 2019-09-04
Supplement: OPEN-8-1190-s001.pdf [file OPEN-8-1190-s001.pdf]

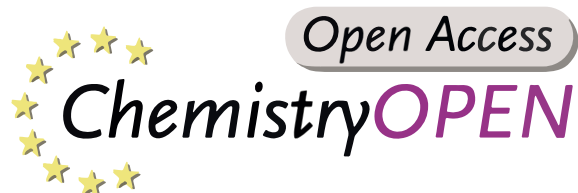

## Supporting Information

© Copyright Wiley-VCH Verlag GmbH & Co. KGaA, 69451 Weinheim, 2019

### **Base-Assisted Conversion of Protonated D-Fructose to 5-HMF: Searching for Gas-Phase Green Models**

Anna Troiani,\* Giulia de Petris, Federico Pepi, Stefania Garzoli, Chiara Salvitti, Marzio Rosi, and Andreina Ricci\*©2019 The Authors. Published by Wiley-VCH Verlag GmbH & Co. KGaA. This is an open access article under the terms of the Creative Commons Attribution Non-Commercial NoDerivs License, which permits use and distribution in any medium, provided the original work is properly cited, the use is non-commercial and no modifications or adaptations are made.

## **Author Contributions**

A.R. Conceptualization:Lead; Investigation:Equal; Methodology:Lead; Writing - Original Draft:Lead; Writing - Review & Editing:Lead

A.T. Data curation:Equal; Investigation:Equal; Writing - Original Draft:Lead; Writing - Review & Editing:Equal

G.d. Data curation:Lead; Writing - Original Draft:Lead; Writing - Review & Editing:Equal

F.P. Data curation:Equal; Writing - Original Draft:Supporting

M.R. Investigation:Equal

S.G. Data curation:Equal

C.S. Data curation:Equal; Formal analysis:Equal

## Supporting Information

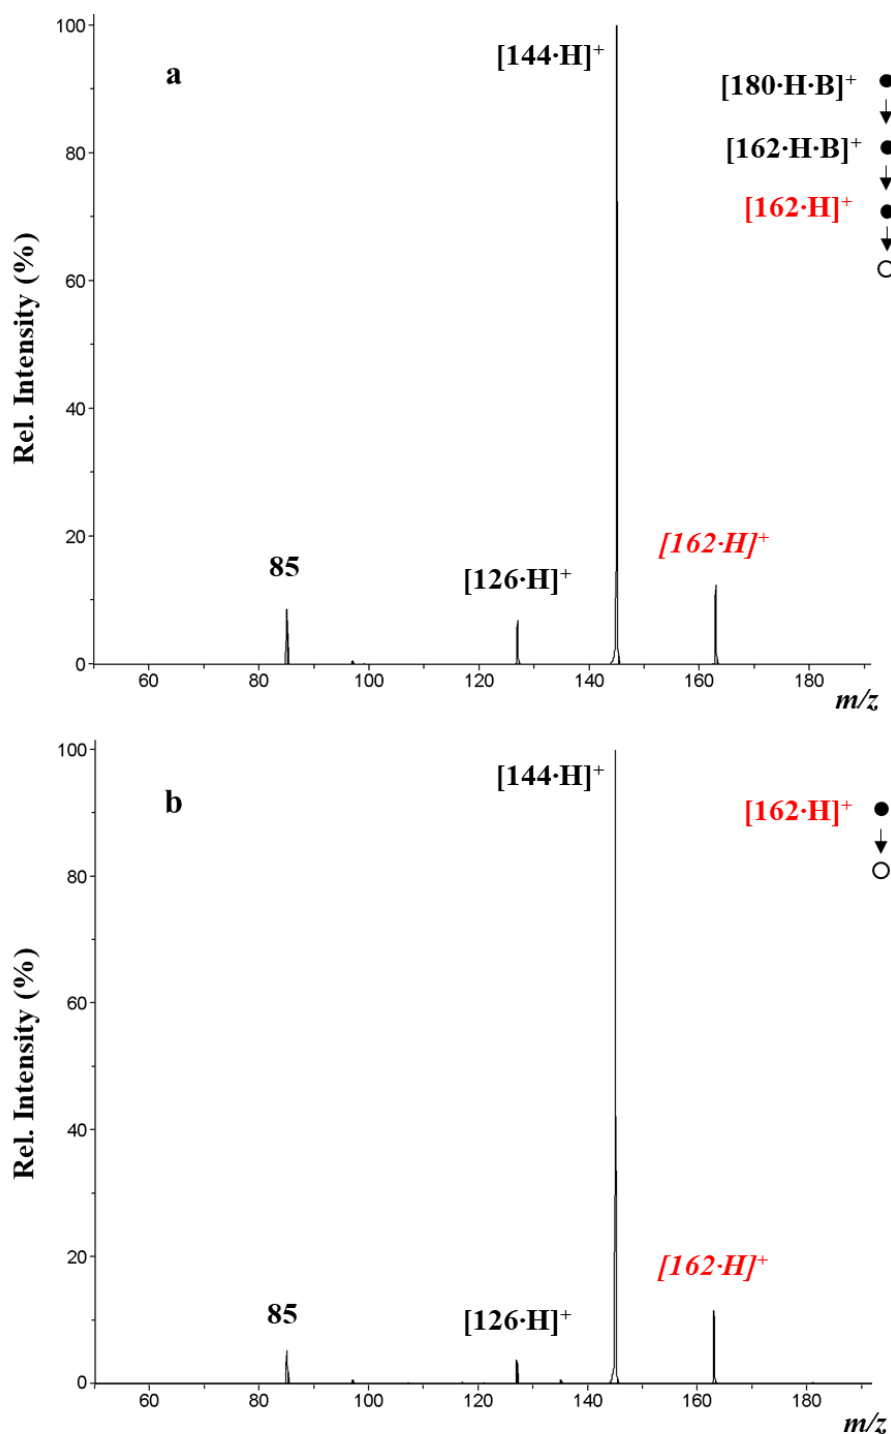

Fig. 1S. (a) CAD spectrum of  $[162\cdot\text{H}]^+$  ions at  $m/z$  163 (in red) isolated from the sequence  $[180\cdot\text{H}\cdot\text{B}]^+ \rightarrow [162\cdot\text{H}\cdot\text{B}]^+ \rightarrow [162\cdot\text{H}]^+$ . (b) CAD spectrum of isolated  $m/z = 163$  ions (in red) obtained from the acid catalyzed dehydration of D-fructose (D-fructose dissolved in  $\text{H}_2\text{O}$ /methanol, 0.1% formic acid).

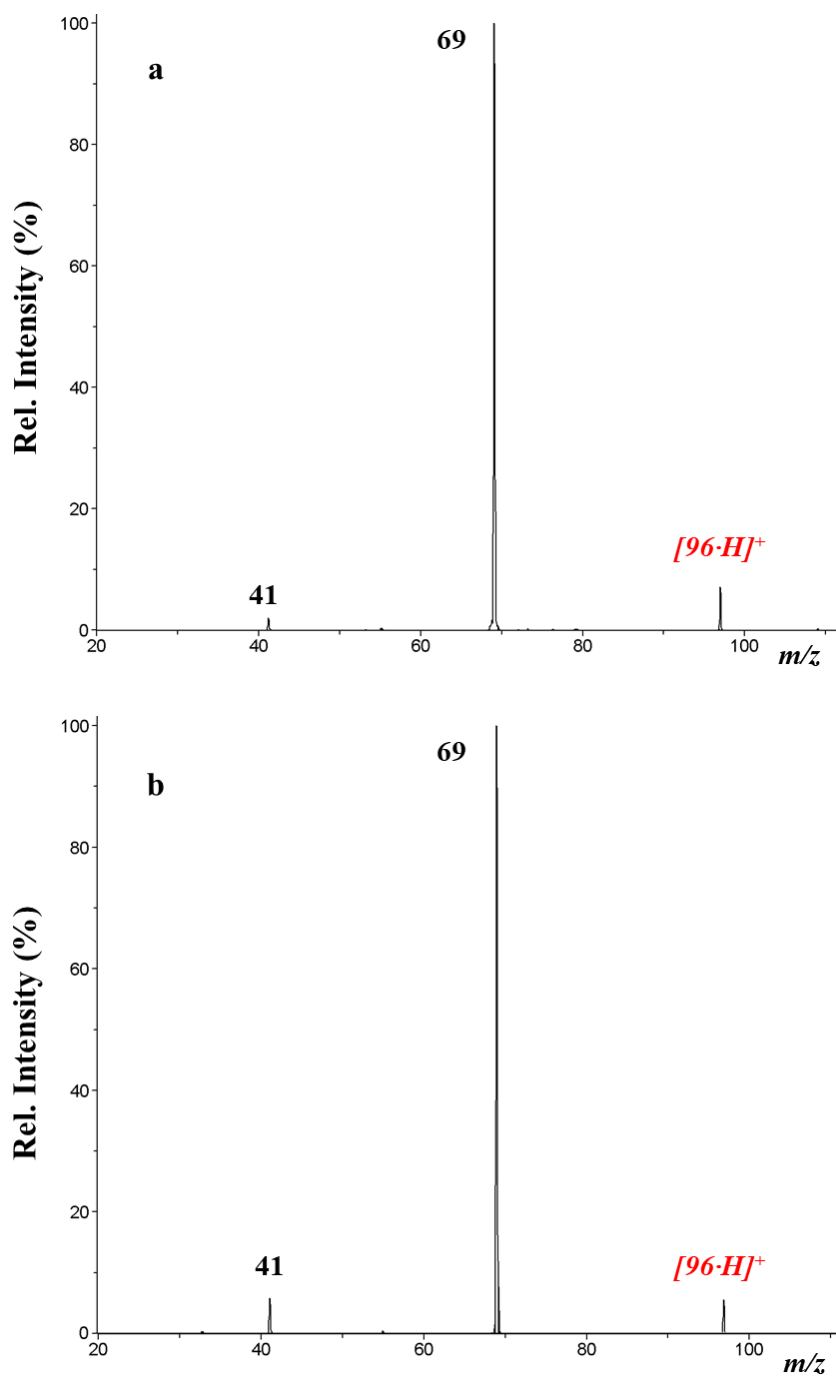

Fig. 2S. (a) CAD spectrum of  $[96\cdot H]^+$  ions at  $m/z$  97 (in red) isolated from a solution containing the D-fructose/ $NH_3$  protonated adduct,  $[180\cdot H\cdot NH_3]^+$ . (b) CAD spectrum of isolated  $[96\cdot H]^+$  ions at  $m/z = 97$  (in red) obtained from the standard protonated 2-furaldehyde,  $[2\text{-FA}]\text{H}^+$ .

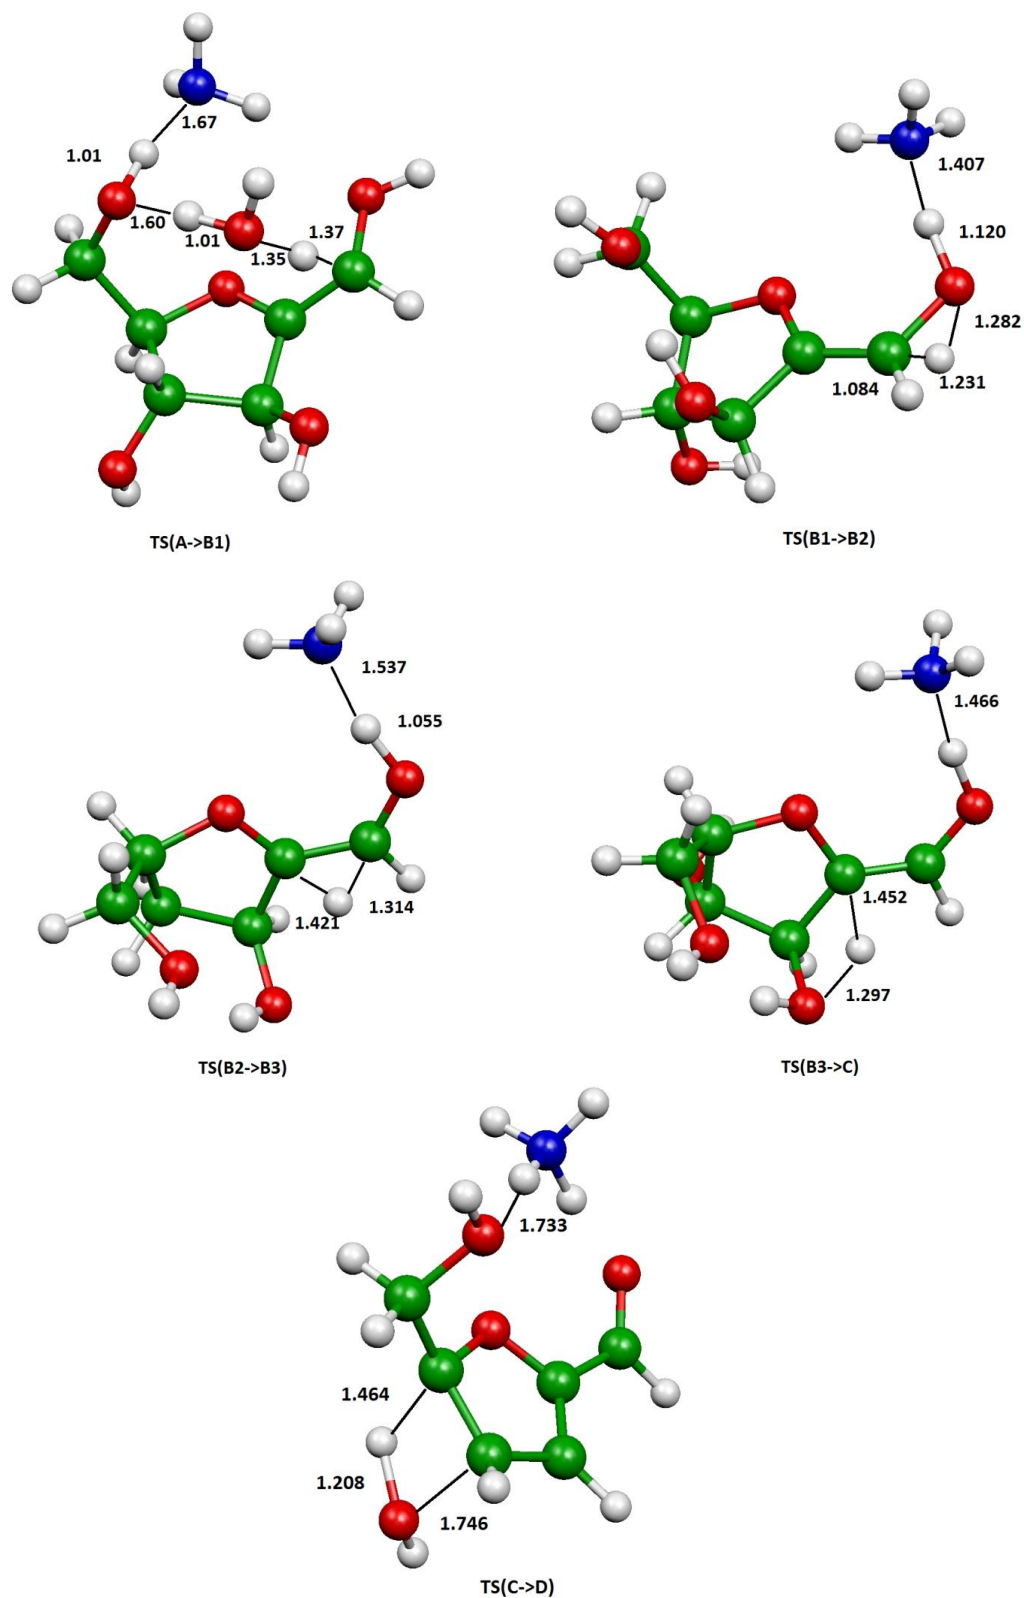

Fig. 3S. Optimized geometries at the B3LYP/6-31G(2df,p) level of theory of the transition states identified on the potential energy surface of the protonated D-fructose dehydration assisted by ammonia. Bond lengths in angstroms.

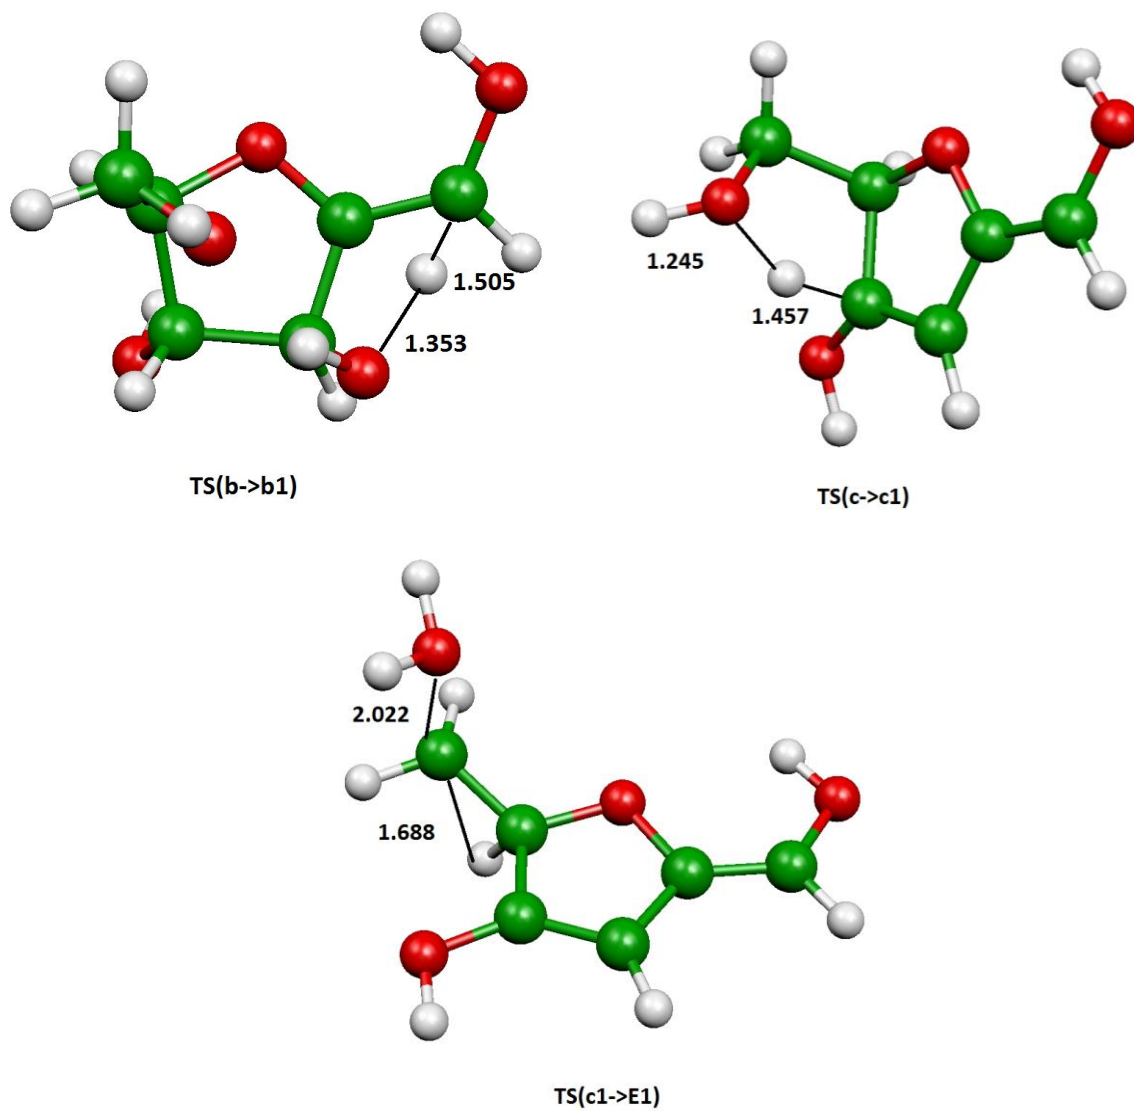

Fig. 4S. Optimized geometries at the B3LYP/6-31G(2df,p) level of theory of the transition states identified on the potential energy surface of the protonated D-fructose dehydration after ammonia loss (path 3). Bond lengths in angstroms.
